# Supplementary material for: A genomic analysis of the archaeal system Ignicoccus hospitalis-Nanoarchaeum equitans
Source: PubMed Central journal article supplement (PMC2614490; doi:10.1186/gb-2008-9-11-r158), 2008-11-10
Supplement: gb-2008-9-11-r158-S1.pdf [file gb-2008-9-11-r158-S1.pdf]

**Table S1.** Crenarchaeal core genes lost by *I. hospitalis*

|         |          |   |                                                                            |
|---------|----------|---|----------------------------------------------------------------------------|
| COG0160 | GabT     | E | 4-aminobutyrate aminotransferase or related aminotransferase               |
| COG0334 | GdhA     | E | Glutamate dehydrogenase/leucine dehydrogenase                              |
| COG0665 | DadA     | E | Glycine/D-amino acid oxidase (deaminating)                                 |
| COG1171 | IlvA     | E | Threonine dehydratase                                                      |
| COG0503 | Apt      | F | Adenine/guanine phosphoribosyltransferase or related PRPP-bi protein       |
| COG0125 | Tmk      | F | Thymidylate kinase                                                         |
| COG0035 | Upp      | F | Uracil phosphoribosyltransferase                                           |
| COG1175 | UgpA     | G | ABC-type sugar transport system, permease component                        |
| COG0166 | Pgi      | G | Glucose-6-phosphate isomerase                                              |
| COG0469 | PykF     | G | Pyruvate kinase                                                            |
| COG0524 | RbsK     | G | Sugar kinase, ribokinase family                                            |
| COG2084 | Mms<br>B | I | 3-hydroxyisobutyrate dehydrogenase or related beta-hydroxyac dehydrogenase |
| COG0330 | HflC     | O | Membrane protease subunit, stomatin/prohibitin homolog                     |
| COG5494 | -        | O | Predicted thioredoxin/glutaredoxin                                         |
| COG3371 | -        | S | Predicted membrane protein                                                 |
| COG1839 | -        | S | Uncharacterized conserved protein                                          |
| COG1849 | -        | S | Uncharacterized protein conserved in archaea                               |
| COG1531 | -        | S | Uncharacterized protein conserved in archaea                               |
| COG4755 | -        | S | Uncharacterized protein conserved in archaea                               |

Table S2. Gain and loss of functional categories in the *I. hospitalis* genome

| arCOG       | Gene | Type | Annotation                                                                                       | CREN | EURY |
|-------------|------|------|--------------------------------------------------------------------------------------------------|------|------|
| <b>Gain</b> |      |      |                                                                                                  |      |      |
| arCOG01607  | PorA | C    | Pyruvate:ferredoxin oxidoreductase or related 2-oxoacid:ferredoxin oxidoreductase, alpha subunit | 0    | 0    |
| arCOG00289  | NfnB | C    | Nitroreductase                                                                                   | 0    | 8    |
| arCOG06056  | HyaD | C    | Ni,Fe-hydrogenase maturation factor                                                              | 4    | 0    |
| arCOG01538  | NuoM | C    | NADH dehydrogenase subunit M                                                                     | 0    | 12   |
| arCOG01495  | BisC | C    | Molybdopterin oxidoreductase                                                                     | 4    | 0    |
| arCOG00959  | -    | C    | Ferredoxin                                                                                       | 0    | 18   |
| arCOG02430  | -    | C    | 6Fe-6S prismane cluster-containing protein                                                       | 0    | 11   |
| arCOG04701  | CrcB | D    | Integral membrane protein possibly involved in chromosome condensation                           | 0    | 18   |
| arCOG02169  | -    | E    | Transglutaminase-like enzyme, putative cysteine protease                                         | 3    | 3    |
| arCOG01621  | Tdh  | E    | Threonine dehydrogenase or related Zn-dependent dehydrogenase                                    | 0    | 6    |
| arCOG02305  | GlnK | E    | Nitrogen regulatory protein PII                                                                  | 2    | 19   |
| arCOG02093  | LeuA | E    | Isopropylmalate/homocitrate/citramalate synthase                                                 | 1    | 6    |
| arCOG00096  | GltB | E    | Glutamate synthase domain 3                                                                      | 0    | 15   |
| arCOG02602  | -    | G    | Thermophilic glucose-6-phosphate isomerase or related metalloenzyme                              | 0    | 14   |
| arCOG07813  | -    | G    | Glycosyl hydrolases family 43                                                                    | 0    | 3    |
| arCOG03396  | SqhC | I    | Squalene cyclase                                                                                 | 0    | 12   |
| arCOG02643  | AcrR | K    | Transcriptional regulator, TetR/AcrR family                                                      | 0    | 11   |
| arCOG00876  | SSL2 | K    | DNA or RNA helicase of superfamily II                                                            | 6    | 4    |
| arCOG03192  | -    | L    | Micrococcal nuclease (thermonuclease)                                                            | 0    | 14   |
| arCOG01392  | WecB | M    | UDP-N-acetylglucosamine 2-epimerase                                                              | 1    | 18   |
| arCOG02080  | -    | M    | S-layer domain                                                                                   | 0    | 10   |
| arCOG01410  | RfaG | M    | Glycosyltransferase                                                                              | 0    | 9    |
| arCOG01405  | RfaG | M    | Glycosyltransferase                                                                              | 0    | 4    |
| arCOG00589  | flhG | N    | Antiactivator of flagellar biosynthesis FlhN, an ATPase                                          | 1    | 17   |
| arCOG02871  | DsbG | O    | Protein-disulfide isomerase                                                                      | 4    | 0    |
| arCOG02790  | AslA | P    | Arylsulfatase A or related enzyme                                                                | 0    | 3    |
| arCOG04989  | SmtA | Q    | SAM-dependent methyltransferase                                                                  | 0    | 11   |
| arCOG01402  | SmtA | Q    | SAM-dependent methyltransferase                                                                  | 1    | 7    |
| arCOG01317  | DhlC | R    | Sodium:solute symporter                                                                          | 0    | 4    |
| arCOG03683  | SPS1 | R    | Serine/threonine protein kinase fused to HEAT repeat domain                                      | 1    | 9    |
| arCOG03834  | -    | R    | ProFAR isomerase family protein                                                                  | 0    | 5    |

|              |             |             |                                                                              |             |             |
|--------------|-------------|-------------|------------------------------------------------------------------------------|-------------|-------------|
| arCOG07561   |             | R           | Predicted regulatory protein containing HTH domain                           | 0           | 6           |
| arCOG02411   | -           | R           | Predicted nuclease of the RNase H fold, HicB family                          | 0           | 12          |
| arCOG00472   |             | R           | Predicted ATPase                                                             | 0           | 9           |
| arCOG06980   |             | S           | vWFA domain containing protein                                               | 3           | 0           |
| arCOG04477   | -           | S           | Uncharacterized protein conserved in archaea                                 | 5           | 25          |
| arCOG02197   | -           | S           | Uncharacterized conserved protein                                            | 0           | 23          |
| arCOG03218   | -           | S           | Uncharacterized conserved protein                                            | 0           | 12          |
| arCOG03216   | -           | S           | Uncharacterized conserved protein                                            | 5           | 12          |
| arCOG03508   | -           | S           | Uncharacterized conserved protein                                            | 0           | 6           |
| arCOG05079   | -           | S           | Uncharacterized conserved protein                                            | 0           | 3           |
| arCOG01240   | -           | S           | Uncharacterized conserved protein                                            | 4           | 0           |
| arCOG04849   |             | S           | Uncharacterized conserved protein                                            | 0           | 5           |
| arCOG06454   |             | S           | Uncharacterized conserved protein                                            | 0           | 4           |
| arCOG07626   |             | S           | Uncharacterized conserved protein                                            | 1           | 1           |
| arCOG03724   |             | S           | Uncharacterized conserved protein                                            | 7           | 1           |
| arCOG05510   |             | S           | Uncharacterized conserved protein                                            | 3           | 0           |
| arCOG06057   |             | S           | Uncharacterized conserved protein                                            | 3           | 0           |
| arCOG03648   |             | S           | Uncharacterized conserved protein                                            | 4           | 0           |
| arCOG05680   |             | S           | Uncharacterized conserved protein                                            | 5           | 0           |
| arCOG03733   |             | S           | Uncharacterized conserved protein                                            | 6           | 0           |
| arCOG00621   | -           | S           | Uncharacterized conserved DUF39 domain fused to ferredoxin domain            | 0           | 15          |
| arCOG02087   | -           | S           | Predicted membrane protein                                                   | 1           | 6           |
| arCOG03812   | -           | S           | Predicted membrane protein                                                   | 1           | 6           |
| arCOG04967   | -           | T           | PII-like signaling protein                                                   | 0           | 13          |
| arCOG04941   | -           | T           | ACT domain-containing protein                                                | 4           | 12          |
| arCOG02958   | SBH1        | U           | Preprotein translocase subunit Sec61beta                                     | 1           | 9           |
| <b>arCOG</b> | <b>Gene</b> | <b>Type</b> | <b>Annotation</b>                                                            | <b>CREN</b> | <b>EURY</b> |
| <b>Loss</b>  |             |             |                                                                              |             |             |
| arCOG01697   | AcnA        | C           | Aconitase A                                                                  | 9           | 12          |
| arCOG01674   | AcyP        | C           | Acylphosphatase                                                              | 11          | 21          |
| arCOG01167   | CoxL        | C           | Aerobic-type carbon monoxide dehydrogenase, large subunit CoxL/CutL homolog  | 9           | 3           |
| arCOG01926   | CoxM        | C           | Aerobic-type carbon monoxide dehydrogenase, middle subunit CoxM/CutM homolog | 9           | 2           |
| arCOG01925   | CoxS        | C           | Aerobic-type carbon monoxide dehydrogenase, small subunit CoxS/CutS homolog  | 9           | 3           |
| arCOG00707   | -           | C           | Aldehyde:ferredoxin oxidoreductase                                           | 8           | 7           |
| arCOG01927   | -           | C           | Carbon monoxide dehydrogenase subunit G, CoxG                                | 9           | 7           |

|            |      |   |                                                                                                                      |    |    |
|------------|------|---|----------------------------------------------------------------------------------------------------------------------|----|----|
| arCOG04237 | GltA | C | Citrate synthase                                                                                                     | 9  | 13 |
| arCOG01721 | QcrB | C | Cytochrome b subunit of the bc complex                                                                               | 8  | 6  |
| arCOG00447 | FixB | C | Electron transfer flavoprotein, alpha subunit                                                                        | 9  | 7  |
| arCOG00446 | FixA | C | Electron transfer flavoprotein, beta subunit                                                                         | 9  | 7  |
| arCOG00961 | GlpC | C | Ferredoxin                                                                                                           | 7  | 0  |
| arCOG01984 | FixX | C | Ferredoxin-like protein                                                                                              | 9  | 3  |
| arCOG00334 | GlpC | C | Fe-S oxidoreductase                                                                                                  | 10 | 5  |
| arCOG01503 | HybA | C | Fe-S-cluster-containing hydrogenase component 1                                                                      | 9  | 0  |
| arCOG01749 | FumC | C | Fumarase                                                                                                             | 7  | 7  |
| arCOG00024 | GlpK | C | Glycerol kinase                                                                                                      | 6  | 10 |
| arCOG01238 | CyoB | C | Heme/copper-type cytochrome/quinol oxidase, subunit 1                                                                | 7  | 3  |
| arCOG01237 | CyoB | C | Heme/copper-type cytochrome/quinol oxidase, subunit 1 and 3                                                          | 6  | 5  |
| arCOG01235 | CyoA | C | Heme/copper-type cytochrome/quinol oxidase, subunit 2                                                                | 6  | 5  |
| arCOG01236 | CyoA | C | Heme/copper-type cytochrome/quinol oxidase, subunit 2                                                                | 7  | 4  |
| arCOG01609 | -    | C | Indolepyruvate ferredoxin oxidoreductase, alpha and beta subunit                                                     | 11 | 21 |
| arCOG01755 | LdhA | C | Lactate dehydrogenase or related 2-hydroxyacid dehydrogenase                                                         | 6  | 7  |
| arCOG00853 | SfcA | C | Malic enzyme                                                                                                         | 10 | 17 |
| arCOG02009 | NhaC | C | Na <sup>+</sup> /H <sup>+</sup> antiporter                                                                           | 2  | 10 |
| arCOG04335 | GltP | C | Na <sup>+</sup> /H <sup>+</sup> -dicarboxylate symporter                                                             | 2  | 10 |
| arCOG01252 | PutA | C | NAD-dependent aldehyde dehydrogenase                                                                                 | 10 | 23 |
| arCOG01551 | NuoC | C | NADH dehydrogenase subunit C                                                                                         | 11 | 12 |
| arCOG01537 | NuoM | C | NADH:ubiquinone oxidoreductase subunit 4 (chain M)                                                                   | 10 | 22 |
| arCOG00288 | NfnB | C | Nitroreductase                                                                                                       | 10 | 24 |
| arCOG05865 | PckA | C | Phosphoenolpyruvate carboxykinase (GTP)                                                                              | 6  | 6  |
| arCOG01004 | -    | C | Predicted acetamidase/formamidase                                                                                    | 4  | 7  |
| arCOG01617 | Tas  | C | Predicted oxidoreductase (related to aryl-alcohol dehydrogenase)                                                     | 8  | 7  |
| arCOG02700 | AceF | C | Pyruvate/2-oxoglutarate dehydrogenase complex, dihydrolipoamide acyltransferase (E2) component (C-terminal fragment) | 3  | 0  |
| arCOG01068 | Lpd  | C | Pyruvate/2-oxoglutarate dehydrogenase complex, dihydrolipoamide dehydrogenase (E3) component or related enzyme       | 11 | 23 |
| arCOG01606 | PorA | C | Pyruvate:ferredoxin oxidoreductase or related 2-oxoacid:ferredoxin oxidoreductase, alpha subunit and gamma           | 11 | 19 |
| arCOG01604 | -    | C | Pyruvate:ferredoxin oxidoreductase or related 2-oxoacid:ferredoxin oxidoreductase, gamma and delta subunit           | 6  | 1  |
| arCOG01357 | -    | C | Radical SAM superfamily enzyme                                                                                       | 11 | 9  |
| arCOG01720 | QcrA | C | Rieske Fe-S protein                                                                                                  | 7  | 4  |
| arCOG01097 | -    | C | Rubryerythrin                                                                                                        | 6  | 19 |
| arCOG04162 | SdhD | C | Succinate dehydrogenase, hydrophobic anchor subunit                                                                  | 3  | 0  |
| arCOG02244 | SdhC | C | Succinate dehydrogenase/fumarate reductase, cytochrome b subunit                                                     | 8  | 7  |

|            |      |   |                                                                                        |    |    |
|------------|------|---|----------------------------------------------------------------------------------------|----|----|
| arCOG00335 | -    | C | Uncharacterized conserved protein containing ferredoxin-like domain                    | 10 | 5  |
| arCOG00506 | FpaA | C | Uncharacterized flavoprotein                                                           | 4  | 3  |
| arCOG04358 | FdhD | C | Uncharacterized protein required for formate dehydrogenase activity                    | 9  | 17 |
| arCOG00915 | GabT | E | 4-aminobutyrate aminotransferase or related aminotransferase                           | 12 | 14 |
| arCOG01798 | HisM | E | ABC-type amino acid transport system, permease component                               | 7  | 13 |
| arCOG01799 | HisJ | E | ABC-type amino acid transport/signal transduction system, periplasmic component/domain | 6  | 14 |
| arCOG01533 | DdpA | E | ABC-type dipeptide transport system, periplasmic component                             | 7  | 5  |
| arCOG00923 | GlnQ | E | ABC-type polar amino acid transport system, ATPase component                           | 7  | 13 |
| arCOG01035 | -    | E | Alanine dehydrogenase, mu-crystallin homolog                                           | 10 | 18 |
| arCOG04779 | -    | E | Asparaginase                                                                           | 11 | 11 |
| arCOG04333 | -    | E | Aspartate/tyrosine/aromatic aminotransferase                                           | 3  | 0  |
| arCOG00863 | ArcC | E | Carbamate kinase                                                                       | 9  | 9  |
| arCOG04080 | DppA | E | D-aminopeptidase                                                                       | 3  | 4  |
| arCOG04172 | DapA | E | Dihydrodipicolinate synthase/N-acetylneuraminase lyase                                 | 10 | 27 |
| arCOG01646 | DAP2 | E | Dipeptidyl aminopeptidase/acylaminoacyl-peptidase                                      | 11 | 12 |
| arCOG04053 | Ggt  | E | Gamma-glutamyltransferase                                                              | 10 | 5  |
| arCOG00027 | GadB | E | Glutamate decarboxylase, L-tyrosine decarboxylase or related PLP-dependent protein     | 4  | 24 |
| arCOG01352 | GdhA | E | Glutamate dehydrogenase/leucine dehydrogenase                                          | 12 | 19 |
| arCOG01303 | GcvH | E | Glycine cleavage system H protein (lipoate-binding)                                    | 6  | 10 |
| arCOG00076 | GcvP | E | Glycine cleavage system protein P (pyridoxal-binding), C-terminal domain               | 5  | 10 |
| arCOG00077 | GcvP | E | Glycine cleavage system protein P (pyridoxal-binding), N-terminal domain               | 5  | 10 |
| arCOG00756 | GcvT | E | Glycine cleavage system T protein (aminomethyltransferase)                             | 6  | 11 |
| arCOG00755 | DadA | E | Glycine/D-amino acid oxidase (deaminating)                                             | 12 | 15 |
| arCOG01351 | ThrA | E | Homoserine dehydrogenase                                                               | 9  | 27 |
| arCOG02462 | -    | E | Kynurenine formamidase                                                                 | 7  | 21 |
| arCOG01888 | AmpS | E | Leucyl aminopeptidase (aminopeptidase T)                                               | 3  | 5  |
| arCOG01316 | PutP | E | Na <sup>+</sup> /proline symporter                                                     | 7  | 24 |
| arCOG01292 | GltD | E | NADPH-dependent glutamate synthase beta chain or related oxidoreductase                | 9  | 15 |
| arCOG01511 | HyuA | E | N-methylhydantoinase A/acetone carboxylase, beta subunit                               | 10 | 14 |
| arCOG01226 | ArgK | E | Putative periplasmic protein kinase ArgK or related GTPase of G3E family               | 4  | 12 |
| arCOG00243 | LYS9 | E | Saccharopine dehydrogenase or related enzyme                                           | 8  | 5  |
| arCOG01431 | IlvA | E | Threonine dehydratase                                                                  | 12 | 8  |
| arCOG01459 | Tdh  | E | Threonine dehydrogenase or related Zn-dependent dehydrogenase                          | 10 | 17 |
| arCOG02165 | -    | E | Transglutaminase-like enzyme, putative cysteine protease                               | 4  | 9  |
| arCOG04247 | -    | E | Zn-dependent carboxypeptidase                                                          | 11 | 9  |
| arCOG04083 | -    | E | Zn-dependent dipeptidase, microsomal dipeptidase homolog                               | 9  | 5  |

|            |      |   |                                                                           |    |    |
|------------|------|---|---------------------------------------------------------------------------|----|----|
| arCOG00031 | Apt  | F | Adenine/guanine phosphoribosyltransferase or related PRPP-binding protein | 12 | 7  |
| arCOG04173 | Cdd  | F | Cytidine deaminase                                                        | 8  | 4  |
| arCOG03448 | FUI1 | F | Cytosine/uracil/thiamine/allantoin permease                               | 4  | 0  |
| arCOG04276 | NrdA | F | Ribonucleotide reductase, alpha subunit                                   | 10 | 19 |
| arCOG01891 | Tmk  | F | Thymidylate kinase                                                        | 12 | 27 |
| arCOG04128 | Upp  | F | Uracil phosphoribosyltransferase                                          | 12 | 10 |
| arCOG00180 | MalK | G | ABC-type sugar transport system, ATPase component                         | 2  | 3  |
| arCOG00149 | UgpB | G | ABC-type sugar transport system, periplasmic component                    | 5  | 1  |
| arCOG00153 | UgpB | G | ABC-type sugar transport system, periplasmic component                    | 5  | 7  |
| arCOG00157 | UgpA | G | ABC-type sugar transport system, permease component                       | 12 | 10 |
| arCOG00159 | UgpE | G | ABC-type sugar transport system, permease component                       | 9  | 9  |
| arCOG03661 | AMS1 | G | Alpha-mannosidase                                                         | 5  | 2  |
| arCOG05412 | BglB | G | Beta-glucosidase/6-phospho-beta-glucosidase/beta-galactosidase            | 10 | 7  |
| arCOG01518 | FrvX | G | Cellulase M or related protein                                            | 9  | 23 |
| arCOG00760 | CitE | G | Citrate lyase beta subunit                                                | 5  | 4  |
| arCOG04044 | FbaB | G | DhnA-type fructose-1,6-bisphosphate aldolase or related enzyme            | 7  | 24 |
| arCOG01421 | GlgP | G | Glucan phosphorylase                                                      | 10 | 13 |
| arCOG00052 | Pgi  | G | Glucose-6-phosphate isomerase                                             | 12 | 10 |
| arCOG01420 | GlgA | G | Glycogen synthase                                                         | 9  | 7  |
| arCOG03278 | -    | G | Glycosyl hydrolase family 57                                              | 10 | 14 |
| arCOG03284 | -    | G | Glycosyl hydrolase family 57                                              | 7  | 0  |
| arCOG00152 | MalE | G | Maltose-binding periplasmic protein                                       | 4  | 3  |
| arCOG00699 | NagA | G | N-acetylglucosamine-6-phosphate deacetylase                               | 5  | 1  |
| arCOG00581 | PrpB | G | PEP phosphonmutase or related enzyme                                      | 9  | 4  |
| arCOG00272 | RhaT | G | permease of the drug/metabolite transporter (DMT) superfamily             | 9  | 7  |
| arCOG00139 | ProP | G | permease of the major facilitator superfamily                             | 3  | 4  |
| arCOG02682 | ProP | G | permease of the major facilitator superfamily                             | 10 | 5  |
| arCOG01114 | PpsA | G | Phosphoenolpyruvate synthase/pyruvate phosphate dikinase                  | 3  | 4  |
| arCOG03659 | -    | G | Predicted N-acetylglucosamine kinase                                      | 5  | 3  |
| arCOG02877 | CDA1 | G | Predicted xylanase/chitin deacetylase                                     | 2  | 7  |
| arCOG04170 | GckA | G | Putative glycerate kinase                                                 | 11 | 11 |
| arCOG04120 | PykF | G | Pyruvate kinase                                                           | 12 | 21 |
| arCOG04443 | RbcL | G | Ribulose 1,5-bisphosphate carboxylase, large subunit                      | 3  | 16 |
| arCOG00016 | RbsK | G | Sugar kinase, ribokinase family                                           | 12 | 7  |
| arCOG07490 | Ble  | G | Uncharacterized protein, probably involved in trehalose biosynthesis      | 3  | 1  |
| arCOG01940 | BirA | H | Biotin-(acetyl-CoA carboxylase) ligase                                    | 6  | 23 |

|            |      |   |                                                                                |    |    |
|------------|------|---|--------------------------------------------------------------------------------|----|----|
| arCOG00489 | -    | H | cob(I)alamin adenosyltransferase                                               | 10 | 12 |
| arCOG04274 | CbiB | H | Cobalamin biosynthesis protein CobD/CbiB                                       | 9  | 27 |
| arCOG04338 | CobS | H | Cobalamin-5-phosphate synthase                                                 | 9  | 27 |
| arCOG01871 | -    | H | GTP:adenosylcobinamide-phosphate guanylyltransferase                           | 9  | 27 |
| arCOG04139 | ApbA | H | Ketopantoate reductase                                                         | 8  | 13 |
| arCOG00660 | LipA | H | Lipoate synthase                                                               | 5  | 5  |
| arCOG01939 | LplA | H | Lipoate-protein ligase A                                                       | 6  | 10 |
| arCOG03837 |      | H | Lipoate-protein ligase A associated domain                                     | 2  | 8  |
| arCOG04348 | UbiE | H | Methylase involved in ubiquinone/menaquinone biosynthesis                      | 9  | 2  |
| arCOG04272 | CobT | H | NaMN:DMB phosphoribosyltransferase                                             | 8  | 27 |
| arCOG00535 | ThiS | H | Sulfur transfer protein involved in thiamine biosynthesis                      | 5  | 21 |
| arCOG00247 | MmsB | I | 3-hydroxyisobutyrate dehydrogenase or related beta-hydroxyacid dehydrogenase   | 12 | 8  |
| arCOG01279 | PaaJ | I | Acetyl-CoA acetyltransferase                                                   | 6  | 1  |
| arCOG01280 | PaaJ | I | Acetyl-CoA acetyltransferase                                                   | 6  | 4  |
| arCOG02705 | -    | I | Acetyl-CoA carboxylase, carboxyltransferase component                          | 6  | 9  |
| arCOG01707 | CaiA | I | Acyl-CoA dehydrogenase                                                         | 9  | 8  |
| arCOG04100 | CaiA | I | Acyl-CoA dehydrogenase                                                         | 4  | 3  |
| arCOG00773 | -    | I | Acyl-CoA hydrolase                                                             | 10 | 7  |
| arCOG00856 | CaiC | I | Acyl-CoA synthetase (AMP-forming)/AMP-acid ligase II                           | 8  | 20 |
| arCOG01529 | Acs  | I | Acyl-coenzyme A synthetase/AMP-(fatty) acid ligase                             | 8  | 8  |
| arCOG02699 | AccB | I | Biotin carboxyl carrier protein                                                | 5  | 5  |
| arCOG01590 | AccC | I | Biotin carboxylase                                                             | 6  | 15 |
| arCOG01879 |      | I | Dolichol kinase family protein                                                 | 10 | 4  |
| arCOG00239 | CaiD | I | Enoyl-CoA hydratase/carnithine racemase                                        | 8  | 8  |
| arCOG03058 | PgpB | I | Membrane-associated phospholipid phosphatase                                   | 3  | 4  |
| arCOG04232 | Sbm  | I | Methylmalonyl-CoA mutase                                                       | 4  | 12 |
| arCOG01710 | Sbm  | I | Methylmalonyl-CoA mutase, C-terminal domain/subunit (cobalamin-binding)        | 4  | 12 |
| arCOG01842 | -    | I | Putative sterol carrier protein                                                | 6  | 5  |
| arCOG01260 | FabG | I | Short-chain alcohol dehydrogenase                                              | 5  | 4  |
| arCOG06042 | TruB | J | DKCLD domain, TruB/PUA associated                                              | 3  | 0  |
| arCOG01346 | -    | J | Predicted RNA-binding protein containing KH domain, possibly ribosomal protein | 7  | 22 |
| arCOG01630 | TdcF | J | Putative translation initiation inhibitor, yjgF family                         | 11 | 10 |
| arCOG04057 |      | J | Ribosomal L38E                                                                 | 8  | 0  |
| arCOG04345 | RPR2 | J | RNase P subunit RPR2                                                           | 6  | 27 |
| arCOG01366 | POP5 | J | RNase P/RNase MRP subunit POP5                                                 | 4  | 0  |
| arCOG01124 | GCD2 | J | Translation initiation factor 2B subunit, eIF-2B alpha/beta/delta family       | 3  | 19 |

|            |      |   |                                                                          |    |    |
|------------|------|---|--------------------------------------------------------------------------|----|----|
| arCOG01125 | GCD2 | J | Translation initiation factor 2B subunit, eIF-2B alpha/beta/delta family | 7  | 5  |
| arCOG00974 | Sun  | J | tRNA or rRNA cytosine-C5-methylase                                       | 3  | 6  |
| arCOG00826 | WecD | K | Acetyltransferase (GNAT) family                                          | 10 | 25 |
| arCOG00874 | SSL2 | K | DNA or RNA helicase of superfamily II                                    | 11 | 16 |
| arCOG01361 | ELP3 | K | Histone acetyltransferase                                                | 9  | 27 |
| arCOG02099 | TroR | K | Mn-dependent transcriptional regulator (DtxR family)                     | 5  | 20 |
| arCOG04248 | SIR2 | K | NAD-dependent protein deacetylase, SIR2 family                           | 11 | 9  |
| arCOG01875 |      | K | ParB-like nuclease domain                                                | 7  | 4  |
| arCOG02217 |      | K | Predicted antitoxin associated with PIN domain                           | 7  | 6  |
| arCOG03846 | -    | K | Predicted antitoxin, copG family                                         | 5  | 1  |
| arCOG00374 | -    | K | Predicted membrane-associated transcriptional regulator                  | 9  | 4  |
| arCOG00393 | -    | K | Predicted membrane-associated transcriptional regulator                  | 9  | 0  |
| arCOG00743 |      | K | Predicted transcriptional regulator                                      | 2  | 4  |
| arCOG01055 | -    | K | Predicted transcriptional regulator                                      | 9  | 11 |
| arCOG02242 | -    | K | Predicted transcriptional regulator                                      | 5  | 13 |
| arCOG03358 | -    | K | Predicted transcriptional regulator                                      | 5  | 0  |
| arCOG03879 | -    | K | Predicted transcriptional regulator                                      | 4  | 0  |
| arCOG05900 | -    | K | Predicted transcriptional regulator                                      | 6  | 0  |
| arCOG07512 | -    | K | Predicted transcriptional regulator                                      | 2  | 0  |
| arCOG00610 | -    | K | Predicted transcriptional regulator, contains C-terminal CBS domains     | 11 | 20 |
| arCOG02271 | -    | K | Predicted transcriptional regulator, c-terminal HTH-like domain          | 7  | 6  |
| arCOG02272 | -    | K | Predicted transcriptional regulator, c-terminal HTH-like domain          | 6  | 8  |
| arCOG00001 | -    | K | Predicted transcriptional regulator, PadR family                         | 10 | 14 |
| arCOG00999 | LSM1 | K | Small nuclear ribonucleoprotein (snRNP) homolog                          | 10 | 0  |
| arCOG02038 | -    | K | Sugar-specific transcriptional regulator TrmB                            | 5  | 11 |
| arCOG01128 | TenA | K | Transcriptional activator TenA                                           | 10 | 9  |
| arCOG01585 | Lrp  | K | Transcriptional regulator (Lrp/AsnC family)                              | 6  | 13 |
| arCOG00812 | AbrB | K | Transcriptional regulator AbrB                                           | 3  | 3  |
| arCOG00815 | AbrB | K | Transcriptional regulator AbrB                                           | 6  | 6  |
| arCOG00818 | AbrB | K | Transcriptional regulator AbrB                                           | 3  | 5  |
| arCOG00820 | AbrB | K | Transcriptional regulator AbrB                                           | 6  | 0  |
| arCOG00731 | ArsR | K | Transcriptional regulator containing HTH domain, ArsR family             | 7  | 6  |
| arCOG01679 | ArsR | K | Transcriptional regulator containing HTH domain, ArsR family             | 7  | 8  |
| arCOG03859 | ArsR | K | Transcriptional regulator containing HTH domain, ArsR family             | 7  | 0  |
| arCOG04056 | ArsR | K | Transcriptional regulator containing HTH domain, ArsR family             | 7  | 0  |
| arCOG05989 |      | K | Transcriptional regulator, xre family                                    | 5  | 0  |



|            |      |   |                                                              |    |    |
|------------|------|---|--------------------------------------------------------------|----|----|
| arCOG00889 | -    | L | Adenine-specific DNA methylase containing a Zn-ribbon        | 4  | 7  |
| arCOG04200 |      | L | CC1 family DNA binding protein                               | 6  | 0  |
| arCOG00329 | PoIB | L | DNA polymerase elongation subunit (family B)                 | 4  | 7  |
| arCOG00282 | -    | L | HerA helicase                                                | 7  | 0  |
| arCOG00285 | -    | L | HerA helicase                                                | 10 | 0  |
| arCOG04155 |      | L | HhH-GPD superfamily base excision DNA repair protein         | 8  | 0  |
| arCOG01072 | MutT | L | NUDIX family hydrolase                                       | 9  | 8  |
| arCOG01073 | MutT | L | NUDIX family hydrolase                                       | 11 | 7  |
| arCOG01083 | MutT | L | NUDIX family hydrolase                                       | 2  | 5  |
| arCOG01442 | -    | L | Predicted HD superfamily hydrolase, possibly a nuclease      | 5  | 2  |
| arCOG01304 | -    | L | Predicted nuclease of the RecB family                        | 11 | 15 |
| arCOG03164 | -    | L | Predicted site-specific integrase-resolvase                  | 6  | 8  |
| arCOG00417 | RecA | L | RecA/RadA recombinase                                        | 3  | 26 |
| arCOG04294 | RecA | L | RecA/RadA recombinase                                        | 5  | 0  |
| arCOG01247 | XerD | L | Site-specific recombinase XerD                               | 3  | 1  |
| arCOG00679 | -    | L | Transposase                                                  | 9  | 13 |
| arCOG05935 | -    | L | Type IV secretory pathway, VirB4 component                   | 6  | 0  |
| arCOG00465 | -    | L | Uncharacterized protein related to Endonuclease III          | 7  | 0  |
| arCOG04188 | RfbC | M | dTDP-4-dehydrorhamnose 3,5-epimerase or related enzyme       | 7  | 17 |
| arCOG01367 | RfbD | M | dTDP-4-dehydrorhamnose reductase                             | 7  | 17 |
| arCOG01371 | RfbB | M | dTDP-D-glucose 4,6-dehydratase                               | 5  | 16 |
| arCOG00895 | WcaA | M | Glycosyltransferase                                          | 4  | 22 |
| arCOG01381 | WcaA | M | Glycosyltransferase                                          | 10 | 20 |
| arCOG01389 | -    | M | Glycosyltransferase                                          | 10 | 20 |
| arCOG01407 | RfaG | M | Glycosyltransferase                                          | 8  | 14 |
| arCOG01408 | RfaG | M | Glycosyltransferase                                          | 5  | 6  |
| arCOG01417 | RfaG | M | Glycosyltransferase                                          | 7  | 2  |
| arCOG00609 | -    | M | Predicted membrane-associated Zn-dependent protease          | 2  | 18 |
| arCOG00059 | AgaS | M | Predicted phosphosugar isomerase                             | 4  | 0  |
| arCOG00673 | -    | M | Predicted sugar nucleotidyltransferase                       | 3  | 8  |
| arCOG02091 | -    | M | S-layer domain                                               | 2  | 0  |
| arCOG01809 | FlaJ | N | Archaeal flagella assembly protein J                         | 4  | 20 |
| arCOG01829 | FlaB | N | Archaeal flagellins                                          | 4  | 20 |
| arCOG00453 | -    | N | Conserved protein implicated in secretion                    | 6  | 0  |
| arCOG01812 | TadC | N | Flp pilus assembly protein TadC                              | 8  | 13 |
| arCOG04148 | FlaH | N | Predicted ATPase involved in biogenesis of archaeal flagella | 4  | 20 |

|            |      |   |                                                                                                |    |    |
|------------|------|---|------------------------------------------------------------------------------------------------|----|----|
| arCOG01824 | FlaF | N | Putative archaeal flagellar protein F                                                          | 4  | 20 |
| arCOG01822 | FlaG | N | Putative archaeal flagellar protein G                                                          | 3  | 20 |
| arCOG00299 | -    | O | DsbA family protein                                                                            | 4  | 0  |
| arCOG02007 | -    | O | Highly conserved protein containing a thioredoxin domain                                       | 6  | 17 |
| arCOG01915 | HflC | O | Membrane protease subunit, stomatin/prohibitin homolog                                         | 12 | 26 |
| arCOG01912 | -    | O | Membrane protein implicated in regulation of membrane protease activity                        | 5  | 16 |
| arCOG01832 | IbpA | O | Molecular chaperone (HSP20 family)                                                             | 10 | 27 |
| arCOG00310 | Bcp  | O | Peroxiredoxin                                                                                  | 10 | 17 |
| arCOG00479 | CyoE | O | Polyprenyltransferase (cytochrome oxidase assembly factor)                                     | 11 | 8  |
| arCOG03686 | -    | O | Predicted redox protein, regulator of disulfide bond formation                                 | 5  | 8  |
| arCOG04235 | -    | O | Predicted thioredoxin/glutaredoxin                                                             | 12 | 0  |
| arCOG05850 | Pcp  | O | Pyrrolidone-carboxylate peptidase (N-terminal pyroglutamyl peptidase)                          | 5  | 4  |
| arCOG00936 | PflA | O | Pyruvate-formate lyase-activating enzyme                                                       | 6  | 4  |
| arCOG00947 | PflA | O | Pyruvate-formate lyase-activating enzyme                                                       | 6  | 1  |
| arCOG00065 | csdA | O | Selenocysteine lyase/Cysteine desulfurase                                                      | 7  | 19 |
| arCOG01910 | NfeD | O | Short-chain alcohol dehydrogenase                                                              | 9  | 13 |
| arCOG00704 | AprE | O | Ssurface layer-associated subtilisin-like serine protease                                      | 7  | 0  |
| arCOG01975 | TrxA | O | Thiol-disulfide isomerase or thioredoxin                                                       | 2  | 4  |
| arCOG06075 | TrxA | O | Thiol-disulfide isomerase or thioredoxin                                                       | 4  | 0  |
| arCOG07518 | TrxA | O | Thiol-disulfide isomerase or thioredoxin                                                       | 2  | 0  |
| arCOG05634 | FdhE | O | Uncharacterized protein involved in formate dehydrogenase formation                            | 3  | 0  |
| arCOG01929 | XdhC | O | Xanthine and CO dehydrogenase maturation factor, XdhC/CoxF family                              | 8  | 4  |
| arCOG02248 | CbiM | P | ABC-type Co <sub>2</sub> <sup>+</sup> transport system, permease component                     | 6  | 21 |
| arCOG03159 | CbiM | P | ABC-type Co <sub>2</sub> <sup>+</sup> transport system, permease component                     | 6  | 2  |
| arCOG00188 | CbiO | P | ABC-type cobalt transport system, ATPase component                                             | 9  | 11 |
| arCOG00202 | CbiO | P | ABC-type cobalt transport system, ATPase component                                             | 6  | 24 |
| arCOG02252 | CbiQ | P | ABC-type cobalt transport system, permease component CbiQ or related transporter               | 3  | 0  |
| arCOG00221 | AfuA | P | ABC-type Fe <sub>3</sub> <sup>+</sup> transport system, periplasmic component                  | 7  | 1  |
| arCOG00163 | ThiP | P | ABC-type Fe <sub>3</sub> <sup>+</sup> transport system, permease component                     | 7  | 10 |
| arCOG05372 | ZnuC | P | ABC-type Mn/Zn transport system, ATPase component                                              | 6  | 2  |
| arCOG00193 | TauB | P | ABC-type nitrate/sulfonate/bicarbonate transport system, ATPase component                      | 10 | 19 |
| arCOG01803 | TauA | P | ABC-type nitrate/sulfonate/bicarbonate transport system, periplasmic component                 | 3  | 16 |
| arCOG00169 | TauC | P | ABC-type nitrate/sulfonate/bicarbonate transport system, permease component                    | 3  | 16 |
| arCOG01576 | ZntA | P | Cation transport ATPase                                                                        | 11 | 24 |
| arCOG01868 | Fur  | P | Fe <sub>2</sub> <sup>+</sup> /Zn <sub>2</sub> <sup>+</sup> uptake regulation protein, fur/PerR | 10 | 7  |
| arCOG01953 | KefB | P | Kef-type K <sup>+</sup> transport system, membrane component                                   | 7  | 20 |

|            |      |   |                                                                                            |    |    |
|------------|------|---|--------------------------------------------------------------------------------------------|----|----|
| arCOG02850 | ArsA | P | Oxyanion-translocating ATPase                                                              | 2  | 0  |
| arCOG00230 | -    | P | Periplasmic molybdate-binding protein/domain                                               | 7  | 1  |
| arCOG02640 | -    | P | Phosphate transport regulator (distant homolog of PhoU)                                    | 4  | 14 |
| arCOG02267 | PitA | P | Phosphate/sulphate permease                                                                | 6  | 22 |
| arCOG01474 | MMT1 | P | Predicted Co/Zn/Cd cation transporter                                                      | 9  | 22 |
| arCOG01479 | MMT1 | P | Predicted Co/Zn/Cd cation transporter                                                      | 2  | 0  |
| arCOG00576 | -    | P | Predicted divalent heavy-metal cations transporter                                         | 7  | 1  |
| arCOG00577 | -    | P | Predicted divalent heavy-metal cations transporter                                         | 5  | 17 |
| arCOG02019 | SseA | P | Rhodanese-related sulfurtransferase                                                        | 7  | 7  |
| arCOG04147 | SodA | P | Superoxide dismutase                                                                       | 9  | 14 |
| arCOG00235 | MhpD | Q | 2-keto-4-pentenoate hydratase/2-oxohepta-3-ene-1,7-dioic acid hydratase (catechol pathway) | 10 | 24 |
| arCOG02004 | -    | Q | Maleate cis-trans isomerase                                                                | 4  | 5  |
| arCOG01521 | -    | Q | Phytoene dehydrogenase or related enzyme                                                   | 5  | 18 |
| arCOG01400 | SmtA | Q | SAM-dependent methyltransferase                                                            | 8  | 5  |
| arCOG03773 | SmtA | Q | SAM-dependent methyltransferase                                                            | 8  | 0  |
| arCOG07511 | SmtA | Q | SAM-dependent methyltransferase, fragment?                                                 | 2  | 0  |
| arCOG02441 | NosY | R | ABC-type transport system involved in multi-copper enzyme maturation, permease component   | 4  | 0  |
| arCOG00186 | -    | R | ABC-type uncharacterized transport system, ATPase component                                | 8  | 8  |
| arCOG00259 | -    | R | ABC-type uncharacterized transport system, permease component                              | 6  | 0  |
| arCOG00260 | -    | R | ABC-type uncharacterized transport system, permease component                              | 7  | 8  |
| arCOG01618 | ARA1 | R | Aldo/keto reductase, related to diketogulonate reductase                                   | 9  | 0  |
| arCOG01648 | MhpC | R | Alpha/beta superfamily hydrolase                                                           | 10 | 16 |
| arCOG00662 | -    | R | Biotin synthase-related enzyme                                                             | 5  | 13 |
| arCOG03031 | ywfl | R | Chlorite dismutase                                                                         | 4  | 7  |
| arCOG04210 | -    | R | Enzyme related to GTP cyclohydrolase I                                                     | 6  | 0  |
| arCOG02291 | -    | R | HAD superfamily hydrolase                                                                  | 11 | 23 |
| arCOG04230 | -    | R | HD supefamily hydrolase                                                                    | 7  | 8  |
| arCOG03721 |      | R | HEPN domain                                                                                | 10 | 0  |
| arCOG03722 |      | R | HEPN domain                                                                                | 9  | 0  |
| arCOG06083 |      | R | Imidazolonepropionase family metallohydrolase                                              | 2  | 0  |
| arCOG00754 | -    | R | Malate/quinone oxidoreductase or related dehydrogenase                                     | 3  | 5  |
| arCOG03682 | SPS1 | R | Membrane associated serine/threonine protein kinase                                        | 9  | 2  |
| arCOG06097 |      | R | Membrane protein, containing cytochrome c-like domain                                      | 2  | 0  |
| arCOG00500 | ElaC | R | Metal-dependent hydrolase of the beta-lactamase superfamily                                | 11 | 13 |
| arCOG00499 | PhnP | R | Metal-dependent hydrolase of the beta-lactamase superfamily                                | 0  | 24 |
| arCOG00441 | -    | R | MoxR-like ATPase                                                                           | 7  | 9  |

|            |      |   |                                                                                    |    |    |
|------------|------|---|------------------------------------------------------------------------------------|----|----|
| arCOG04466 | -    | R | Na <sup>+</sup> -dependent transporter of the SNF family                           | 2  | 14 |
| arCOG01299 | HcaD | R | NAD(FAD)-dependent dehydrogenase                                                   | 4  | 4  |
| arCOG04215 | -    | R | NH <sub>2</sub> -acetyltransferase                                                 | 3  | 3  |
| arCOG01995 | -    | R | Oligoketide cyclase/lipid transport protein family                                 | 6  | 3  |
| arCOG02293 | -    | R | Phosphatase/phosphohexomutase HAD superfamily                                      | 9  | 9  |
| arCOG04702 | -    | R | Phospholipid-binding protein                                                       | 8  | 19 |
| arCOG02214 | RfbX | R | Polysaccharide biosynthesis protein, Mvin family                                   | 6  | 0  |
| arCOG03647 | -    | R | Predicted acetyltransferase                                                        | 3  | 5  |
| arCOG06090 | -    | R | Predicted acetyltransferase                                                        | 2  | 0  |
| arCOG02303 | SurE | R | Predicted acid phosphatase                                                         | 8  | 22 |
| arCOG02959 | lap  | R | Predicted aminopeptidase                                                           | 3  | 9  |
| arCOG00887 | -    | R | Predicted ATPase (AAA+ superfamily)                                                | 4  | 4  |
| arCOG04052 | -    | R | Predicted cation transporter                                                       | 5  | 4  |
| arCOG04227 | -    | R | Predicted CoA-binding protein                                                      | 7  | 14 |
| arCOG02238 | -    | R | Predicted DNA-binding protein                                                      | 4  | 18 |
| arCOG04212 | -    | R | Predicted DNA-binding protein with PD1-like DNA-binding motif                      | 4  | 21 |
| arCOG01229 | -    | R | Predicted GTPase                                                                   | 8  | 5  |
| arCOG01860 | -    | R | Predicted HD superfamily hydrolase                                                 | 3  | 16 |
| arCOG01215 | -    | R | Predicted hydrolase (HAD superfamily)                                              | 2  | 4  |
| arCOG01350 | -    | R | Predicted inorganic polyphosphate/ATP-NAD kinase                                   | 6  | 14 |
| arCOG05320 | -    | R | Predicted membrane-bound metal-dependent hydrolase                                 | 6  | 1  |
| arCOG03705 | -    | R | Predicted metal-dependent hydrolase                                                | 9  | 3  |
| arCOG01930 | -    | R | Predicted metal-dependent hydrolase of the TIM-barrel fold                         | 4  | 1  |
| arCOG01931 | -    | R | Predicted metal-dependent hydrolase of the TIM-barrel fold                         | 5  | 7  |
| arCOG01254 | -    | R | Predicted metal-dependent hydrolase related to alanyl-tRNA synthetase HxxxH domain | 11 | 13 |
| arCOG01138 | -    | R | Predicted metal-dependent protease of the PAD1/JAB1 superfamily                    | 7  | 8  |
| arCOG04217 | -    | R | Predicted metallopeptidase                                                         | 11 | 0  |
| arCOG01283 | -    | R | Predicted nucleic-acid-binding protein containing a Zn-ribbon                      | 8  | 3  |
| arCOG01287 | -    | R | Predicted nucleic-acid-binding protein containing a Zn-ribbon                      | 6  | 4  |
| arCOG01288 | -    | R | Predicted nucleic-acid-binding protein containing a Zn-ribbon                      | 6  | 1  |
| arCOG01204 | -    | R | Predicted nucleotidyltransferase                                                   | 9  | 3  |
| arCOG01205 | -    | R | Predicted nucleotidyltransferase                                                   | 11 | 6  |
| arCOG04046 | -    | R | Predicted phosphatase                                                              | 6  | 2  |
| arCOG01144 | lcc  | R | Predicted phosphohydrolase                                                         | 7  | 2  |
| arCOG04328 | -    | R | Predicted P-loop ATPase/GTPase                                                     | 6  | 5  |
| arCOG04331 | -    | R | Predicted thioesterase                                                             | 6  | 1  |

|            |      |   |                                                                                                 |    |    |
|------------|------|---|-------------------------------------------------------------------------------------------------|----|----|
| arCOG01093 | -    | R | Protein distantly related to bacterial ferritins                                                | 5  | 8  |
| arCOG04082 | -    | R | Protein related to penicillin acylase                                                           | 5  | 6  |
| arCOG05825 | -    | R | Radical SAM superfamily enzyme                                                                  | 5  | 4  |
| arCOG02284 | -    | R | Secreted protein containing C-terminal beta-propeller domain distantly related to WD-40 repeats | 5  | 7  |
| arCOG00264 | -    | R | Sulfite oxidase or related enzyme                                                               | 11 | 7  |
| arCOG01137 | FcbC | R | Thioesterase superfamily enzyme                                                                 | 8  | 13 |
| arCOG03038 | NrfG | R | TPR repeats containing protein                                                                  | 4  | 12 |
| arCOG04197 |      | R | Transposase related protein                                                                     | 4  | 1  |
| arCOG00257 | Med  | R | Uncharacterized ABC-type transport system, periplasmic component/surface lipoprotein            | 6  | 2  |
| arCOG00258 | Med  | R | Uncharacterized ABC-type transport system, periplasmic component/surface lipoprotein            | 7  | 7  |
| arCOG00261 | -    | R | Uncharacterized ABC-type transport system, permease component                                   | 7  | 8  |
| arCOG00262 | -    | R | Uncharacterized ABC-type transport system, permease component                                   | 5  | 0  |
| arCOG00932 | -    | R | Uncharacterized conserved protein related to pyruvate formate-lyase activating enzyme           | 10 | 22 |
| arCOG02742 | -    | R | Uncharacterized conserved protein, DUF58 family, contains vWF domain                            | 5  | 11 |
| arCOG04284 | yhhQ | R | Uncharacterized member of the PurR regulon                                                      | 7  | 9  |
| arCOG01873 | -    | R | Uncharacterized MobA-related protein                                                            | 9  | 6  |
| arCOG00442 | -    | R | Uncharacterized protein containing a von Willebrand factor type A (vWA) domain                  | 11 | 4  |
| arCOG02900 | -    | R | Uncharacterized protein containing a von Willebrand factor type A (vWA) domain                  | 5  | 5  |
| arCOG04285 | PrpD | R | Uncharacterized protein involved in propionate catabolism                                       | 9  | 5  |
| arCOG01455 | AdhP | R | Zn-dependent alcohol dehydrogenase                                                              | 11 | 9  |
| arCOG00498 | GloB | R | Zn-dependent hydrolase, glyoxylase family                                                       | 10 | 10 |
| arCOG05978 |      | S | Extracellular protein containing Kelch and FN3 domains                                          | 4  | 3  |
| arCOG01191 | -    | S | HEPN domain containing protein                                                                  | 11 | 10 |
| arCOG01615 | -    | S | Predicted membrane protein                                                                      | 10 | 7  |
| arCOG02008 | -    | S | Predicted membrane protein                                                                      | 12 | 10 |
| arCOG02159 | -    | S | Predicted membrane protein                                                                      | 9  | 12 |
| arCOG02228 | -    | S | Predicted membrane protein                                                                      | 4  | 10 |
| arCOG02718 | -    | S | Predicted membrane protein                                                                      | 7  | 5  |
| arCOG03749 | -    | S | Predicted membrane protein                                                                      | 9  | 1  |
| arCOG04203 | -    | S | Predicted membrane protein                                                                      | 2  | 12 |
| arCOG00287 |      | S | Predicted NurA-like nuclease                                                                    | 10 | 0  |
| arCOG03765 |      | S | Uncharacterized conserved membrane protein                                                      | 8  | 0  |
| arCOG07272 |      | S | Uncharacterized conserved membrane protein                                                      | 5  | 2  |
| arCOG01572 |      | S | Uncharacterized conserved membrane protein                                                      | 9  | 5  |
| arCOG00022 |      | S | Uncharacterized conserved protein                                                               | 3  | 1  |
| arCOG00372 |      | S | Uncharacterized conserved protein                                                               | 3  | 5  |

|            |   |                                   |    |   |
|------------|---|-----------------------------------|----|---|
| arCOG00425 | S | Uncharacterized conserved protein | 3  | 0 |
| arCOG01310 | S | Uncharacterized conserved protein | 6  | 1 |
| arCOG01315 | S | Uncharacterized conserved protein | 2  | 0 |
| arCOG01806 | S | Uncharacterized conserved protein | 3  | 4 |
| arCOG02103 | S | Uncharacterized conserved protein | 10 | 4 |
| arCOG02218 | S | Uncharacterized conserved protein | 7  | 0 |
| arCOG03129 | S | Uncharacterized conserved protein | 3  | 3 |
| arCOG03754 | S | Uncharacterized conserved protein | 5  | 3 |
| arCOG03820 | S | Uncharacterized conserved protein | 2  | 4 |
| arCOG03824 | S | Uncharacterized conserved protein | 3  | 3 |
| arCOG03838 | S | Uncharacterized conserved protein | 4  | 4 |
| arCOG03872 | S | Uncharacterized conserved protein | 3  | 0 |
| arCOG03882 | S | Uncharacterized conserved protein | 6  | 0 |
| arCOG04024 | S | Uncharacterized conserved protein | 2  | 2 |
| arCOG04025 | S | Uncharacterized conserved protein | 5  | 2 |
| arCOG04033 | S | Uncharacterized conserved protein | 3  | 1 |
| arCOG04039 | S | Uncharacterized conserved protein | 6  | 1 |
| arCOG04079 | S | Uncharacterized conserved protein | 2  | 4 |
| arCOG04104 | S | Uncharacterized conserved protein | 4  | 0 |
| arCOG04141 | S | Uncharacterized conserved protein | 3  | 0 |
| arCOG04158 | S | Uncharacterized conserved protein | 2  | 3 |
| arCOG04165 | S | Uncharacterized conserved protein | 4  | 0 |
| arCOG04211 | S | Uncharacterized conserved protein | 3  | 0 |
| arCOG04216 | S | Uncharacterized conserved protein | 4  | 0 |
| arCOG04259 | S | Uncharacterized conserved protein | 3  | 1 |
| arCOG04267 | S | Uncharacterized conserved protein | 4  | 0 |
| arCOG04268 | S | Uncharacterized conserved protein | 5  | 0 |
| arCOG04275 | S | Uncharacterized conserved protein | 4  | 0 |
| arCOG04283 | S | Uncharacterized conserved protein | 7  | 0 |
| arCOG04326 | S | Uncharacterized conserved protein | 3  | 0 |
| arCOG05371 | S | Uncharacterized conserved protein | 5  | 2 |
| arCOG05401 | S | Uncharacterized conserved protein | 6  | 3 |
| arCOG05472 | S | Uncharacterized conserved protein | 6  | 0 |
| arCOG05561 | S | Uncharacterized conserved protein | 7  | 0 |
| arCOG05906 | S | Uncharacterized conserved protein | 4  | 0 |
| arCOG05924 | S | Uncharacterized conserved protein | 4  | 0 |

|            |   |                                   |                                   |    |    |
|------------|---|-----------------------------------|-----------------------------------|----|----|
| arCOG05988 | S | Uncharacterized conserved protein | 4                                 | 0  |    |
| arCOG06022 | S | Uncharacterized conserved protein | 7                                 | 0  |    |
| arCOG06071 | S | Uncharacterized conserved protein | 4                                 | 0  |    |
| arCOG06076 | S | Uncharacterized conserved protein | 2                                 | 0  |    |
| arCOG06081 | S | Uncharacterized conserved protein | 2                                 | 0  |    |
| arCOG06082 | S | Uncharacterized conserved protein | 2                                 | 0  |    |
| arCOG06087 | S | Uncharacterized conserved protein | 2                                 | 0  |    |
| arCOG06088 | S | Uncharacterized conserved protein | 4                                 | 0  |    |
| arCOG06092 | S | Uncharacterized conserved protein | 2                                 | 0  |    |
| arCOG06094 | S | Uncharacterized conserved protein | 2                                 | 0  |    |
| arCOG06095 | S | Uncharacterized conserved protein | 2                                 | 0  |    |
| arCOG06096 | S | Uncharacterized conserved protein | 4                                 | 0  |    |
| arCOG06098 | S | Uncharacterized conserved protein | 2                                 | 0  |    |
| arCOG06100 | S | Uncharacterized conserved protein | 3                                 | 0  |    |
| arCOG06101 | S | Uncharacterized conserved protein | 3                                 | 0  |    |
| arCOG06102 | S | Uncharacterized conserved protein | 3                                 | 0  |    |
| arCOG06104 | S | Uncharacterized conserved protein | 2                                 | 0  |    |
| arCOG06105 | S | Uncharacterized conserved protein | 2                                 | 0  |    |
| arCOG06689 | S | Uncharacterized conserved protein | 2                                 | 1  |    |
| arCOG07192 | S | Uncharacterized conserved protein | 4                                 | 0  |    |
| arCOG07300 | S | Uncharacterized conserved protein | 3                                 | 0  |    |
| arCOG07331 | S | Uncharacterized conserved protein | 4                                 | 0  |    |
| arCOG07459 | S | Uncharacterized conserved protein | 2                                 | 0  |    |
| arCOG07462 | S | Uncharacterized conserved protein | 2                                 | 0  |    |
| arCOG07463 | S | Uncharacterized conserved protein | 2                                 | 0  |    |
| arCOG07464 | S | Uncharacterized conserved protein | 2                                 | 0  |    |
| arCOG07493 | S | Uncharacterized conserved protein | 3                                 | 0  |    |
| arCOG07515 | S | Uncharacterized conserved protein | 2                                 | 0  |    |
| arCOG07516 | S | Uncharacterized conserved protein | 2                                 | 0  |    |
| arCOG07753 | S | Uncharacterized conserved protein | 2                                 | 0  |    |
| arCOG07754 | S | Uncharacterized conserved protein | 2                                 | 0  |    |
| arCOG07755 | S | Uncharacterized conserved protein | 2                                 | 0  |    |
| arCOG07864 | S | Uncharacterized conserved protein | 2                                 | 0  |    |
| arCOG07865 | S | Uncharacterized conserved protein | 2                                 | 0  |    |
| arCOG00021 | - | S                                 | Uncharacterized conserved protein | 11 | 13 |
| arCOG00723 | - | S                                 | Uncharacterized conserved protein | 8  | 4  |

|            |        |   |                                                                            |    |    |
|------------|--------|---|----------------------------------------------------------------------------|----|----|
| arCOG00761 | -      | S | Uncharacterized conserved protein                                          | 11 | 19 |
| arCOG01699 | -      | S | Uncharacterized conserved protein                                          | 10 | 0  |
| arCOG01713 | -      | S | Uncharacterized conserved protein                                          | 6  | 2  |
| arCOG02118 | -      | S | Uncharacterized conserved protein                                          | 2  | 0  |
| arCOG02287 | -      | S | Uncharacterized conserved protein                                          | 6  | 18 |
| arCOG03217 | -      | S | Uncharacterized conserved protein                                          | 4  | 0  |
| arCOG03229 | -      | S | Uncharacterized conserved protein                                          | 5  | 13 |
| arCOG04058 | -      | S | Uncharacterized conserved protein                                          | 3  | 18 |
| arCOG04298 | -      | S | Uncharacterized conserved protein                                          | 12 | 10 |
| arCOG04507 | -      | S | Uncharacterized conserved protein                                          | 9  | 8  |
| arCOG04733 | -      | S | Uncharacterized conserved protein                                          | 5  | 22 |
| arCOG07519 |        | S | Uncharacterized conserved protein                                          | 2  | 0  |
| arCOG01422 | -      | S | Uncharacterized conserved protein containing a coiled-coil domain          | 9  | 0  |
| arCOG04374 | -      | S | Uncharacterized conserved protein related to dihydrodipicolinate reductase | 3  | 1  |
| arCOG01994 | SpolIM | S | Uncharacterized membrane protein                                           | 3  | 22 |
| arCOG00317 | -      | S | Uncharacterized protein conserved in archaea                               | 8  | 3  |
| arCOG01224 | -      | S | Uncharacterized protein conserved in archaea                               | 12 | 27 |
| arCOG01244 | -      | S | Uncharacterized protein conserved in archaea                               | 5  | 2  |
| arCOG01302 | -      | S | Uncharacterized protein conserved in archaea                               | 12 | 14 |
| arCOG01668 | -      | S | Uncharacterized protein conserved in archaea                               | 7  | 5  |
| arCOG03772 | -      | S | Uncharacterized protein conserved in archaea                               | 10 | 4  |
| arCOG03880 | -      | S | Uncharacterized protein conserved in archaea                               | 2  | 4  |
| arCOG04123 | -      | S | Uncharacterized protein conserved in archaea                               | 12 | 0  |
| arCOG04132 | -      | S | Uncharacterized protein conserved in archaea                               | 5  | 4  |
| arCOG04085 | -      | S | Uncharacterized protein conserved in bacteria                              | 5  | 0  |
| arCOG03460 | -      | S | Uncharacterized protein, LmbE homolog                                      | 5  | 9  |
| arCOG06080 |        | S | vWFA domain containing protein                                             | 3  | 0  |
| arCOG05332 | -      | T | FHA domain containing protein                                              | 9  | 1  |
| arCOG00449 | UspA   | T | Nucleotide-binding protein, UspA family                                    | 3  | 18 |
| arCOG03413 | CDC14  | T | Predicted protein-tyrosine phosphatase                                     | 10 | 10 |
| arCOG01174 | RAD55  | T | RecA-superfamily ATPase implicated in signal transduction                  | 7  | 10 |
| arCOG01148 | ApaH   | T | Serine/threonine protein phosphatase PP2A family                           | 3  | 17 |
| arCOG01463 | -      | V | ABC-type multidrug transport system, permease component                    | 5  | 14 |
| arCOG01465 | -      | V | ABC-type multidrug transport system, permease component                    | 10 | 8  |
| arCOG00771 | AmpC   | V | Beta-lactamase class C and other penicillin binding protein                | 4  | 7  |
| arCOG02658 | -      | V | CRISPR system related protein, RAMP superfamily                            | 8  | 8  |



|            |      |   |                                                             |   |    |
|------------|------|---|-------------------------------------------------------------|---|----|
| arCOG03779 | McrB | V | GTPase subunit of restriction endonuclease                  | 9 | 0  |
| arCOG01731 | NorM | V | Na <sup>+</sup> -driven multidrug efflux pump               | 3 | 20 |
| arCOG00713 | -    | V | PIN domain containing protein                               | 5 | 4  |
| arCOG00726 | -    | V | PIN domain containing protein                               | 8 | 3  |
| arCOG00727 | -    | V | PIN domain containing protein                               | 7 | 0  |
| arCOG00729 | -    | V | PIN domain containing protein                               | 8 | 0  |
| arCOG02730 | -    | V | PIN domain containing protein                               | 6 | 5  |
| arCOG02731 | VapC | V | PIN domain containing protein                               | 3 | 0  |
| arCOG06028 | VapC | V | PIN domain containing protein                               | 6 | 0  |
| arCOG02219 | VapC | V | Predicted nucleic acid-binding protein, contains PIN domain | 6 | 14 |

Table S3. Functional gene categories (arCOGs) present in *N. equitans* but absent in *I. hospitalis* and their distribution in archaeal genomes

| arCOG      | Gene | Type | Annotation                                                                     | CREN | EURY | Nano protein ID |
|------------|------|------|--------------------------------------------------------------------------------|------|------|-----------------|
| arCOG02200 | Hmp  | C    | Flavodoxin reductase (ferredoxin-NADPH reductase) family 1                     | 0    | 7    | NEQ051          |
| arCOG02201 | FtsZ | D    | Cell division GTPase                                                           | 0    | 26   | NEQ133          |
| arCOG02297 | IlvE | E    | Branched-chain amino acid aminotransferase/4-amino-4-deoxychorismate lyase     | 3    | 20   | NEQ190          |
| arCOG01352 | GdhA | E    | Glutamate dehydrogenase/leucine dehydrogenase                                  | 12   | 19   | NEQ077          |
| arCOG04247 | -    | E    | Zn-dependent carboxypeptidase                                                  | 11   | 9    | NEQ042          |
| arCOG00438 | -    | R    | AAA family ATPase                                                              | 1    | 17   | NEQ401          |
| arCOG00546 | -    | J    | mRNA degradation ribonuclease J1/J2 (metallo-beta-lactamase superfamily)       | 0    | 23   | NEQ466          |
| arCOG01346 | -    | J    | Predicted RNA-binding protein containing KH domain, possibly ribosomal protein | 7    | 22   | NEQ428          |

|            |        |   |                                                                                                           |    |    |        |
|------------|--------|---|-----------------------------------------------------------------------------------------------------------|----|----|--------|
| arCOG04449 | TruA   | J | Pseudouridylate synthase                                                                                  | 4  | 27 | NEQ333 |
| arCOG00990 | -      | J | Queuine tRNA-ribosyltransferase, contain PUA domain                                                       | 1  | 26 | NEQ526 |
| arCOG00122 | TrmA   | J | SAM-dependent methyltransferase related to tRNA (uracil-5-)-methyltransferase                             | 0  | 4  | NEQ053 |
| arCOG02037 | -      | K | Sugar-specific transcriptional regulator TrmB                                                             | 8  | 21 | NEQ098 |
| arCOG04447 | -      | L | Archaeal DNA polymerase II, large subunit                                                                 | 0  | 27 | NEQ420 |
| arCOG04455 | HYS2   | L | Archaeal DNA polymerase II, small subunit/DNA polymerase delta, subunit B                                 | 0  | 26 | NEQ240 |
| arCOG00331 | PolB   | L | DNA polymerase elongation subunit (family B)                                                              | 0  | 2  | NEQ528 |
| arCOG00872 | MPH1   | L | ERCC4-like helicase                                                                                       | 0  | 26 | NEQ387 |
| arCOG02144 | HHT1   | L | Histones H3 and H4                                                                                        | 2  | 24 | NEQ288 |
| arCOG00424 | RecJ   | L | Single-stranded DNA-specific exonuclease RecJ                                                             | 5  | 5  | NEQ118 |
| arCOG00787 | UvrD   | L | Superfamily I DNA and RNA helicase                                                                        | 0  | 3  | NEQ549 |
| arCOG01381 | WcaA   | M | Glycosyltransferase                                                                                       | 10 | 20 | NEQ172 |
| arCOG01812 | TadC   | N | Flp pilus assembly protein TadC                                                                           | 8  | 13 | NEQ268 |
| arCOG01818 | VirB11 | N | Type IV secretory pathway, VirB11 component, or related ATPase involved in archaeal flagella biosynthesis | 4  | 13 | NEQ425 |
| arCOG01716 | sufB   | O | Cysteine desulfurase activator SufB                                                                       | 0  | 6  | NEQ129 |
| arCOG01832 | lbpA   | O | Molecular chaperone (HSP20 family)                                                                        | 10 | 27 | NEQ344 |
| arCOG01311 | SppA   | O | Periplasmic serine protease (ClpP class)                                                                  | 5  | 20 | NEQ315 |
| arCOG02160 | LonB   | O | Predicted ATP-dependent protease                                                                          | 0  | 26 | NEQ349 |
| arCOG01188 | -      | O | Predicted carbamoyl transferase, NodU family                                                              | 1  | 8  | NEQ127 |
| arCOG02881 | ECM27  | P | Ca <sup>2+</sup> /Na <sup>+</sup> antiporter                                                              | 8  | 23 | NEQ486 |
| arCOG02265 | CorA   | P | Mg <sup>2+</sup> and Co <sup>2+</sup> transporter                                                         | 2  | 16 | NEQ501 |
| arCOG04355 | Mae    | C | mae1-like C4-dicarboxylate transporter                                                                    | 1  | 7  | NEQ014 |
| arCOG04347 | SmtA   | Q | SAM-dependent methyltransferase                                                                           | 1  | 13 | NEQ490 |
| arCOG00601 | -      | R | CBS domain                                                                                                | 5  | 18 | NEQ084 |
| arCOG04702 | -      | R | Phospholipid-binding protein                                                                              | 8  | 19 | NEQ159 |
| arCOG02209 | RfbX   | R | Polysaccharide biosynthesis protein, Mvin family                                                          | 4  | 27 | NEQ090 |
| arCOG01204 | -      | R | Predicted nucleotidyltransferase                                                                          | 9  | 3  | NEQ050 |
| arCOG02642 | yhhT   | R | Predicted permease, member of the PurR regulon                                                            | 0  | 22 | NEQ162 |
| arCOG02292 | Gph    | R | Predicted phosphatase                                                                                     | 1  | 18 | NEQ340 |
| arCOG03450 | -      | R | Predicted surface protease of transglutaminase family                                                     | 0  | 8  | NEQ353 |
| arCOG04065 | PqqL   | R | Predicted Zn-dependent peptidase                                                                          | 6  | 0  | NEQ023 |
| arCOG02155 | -      | R | Protein implicated in RNA metabolism, contains PRC-barrel domain                                          | 0  | 26 | NEQ258 |
| arCOG02742 | -      | R | Uncharacterized conserved protein, DUF58 family, contains vWF domain                                      | 5  | 11 | NEQ232 |
| arCOG02900 | -      | R | Uncharacterized protein containing a von Willebrand factor type A (vWA) domain                            | 5  | 5  | NEQ403 |
| arCOG01378 | -      | R | Uncharacterized protein of the AP superfamily                                                             | 5  | 9  | NEQ128 |

|            |      |   |                                                          |   |    |        |
|------------|------|---|----------------------------------------------------------|---|----|--------|
| arCOG02737 | -    | S | NifX family protein                                      | 4 | 3  | NEQ386 |
| arCOG04469 | -    | S | Predicted membrane protein                               | 0 | 24 | NEQ455 |
| arCOG02177 | -    | S | Predicted membrane protein                               | 0 | 22 | NEQ352 |
| arCOG06945 |      | S | Uncharacterized conserved protein                        | 1 | 0  | NEQ026 |
| arCOG06946 |      | S | Uncharacterized conserved membrane protein               | 1 | 0  | NEQ415 |
| arCOG01814 |      | S | Uncharacterized conserved membrane protein               | 0 | 8  | NEQ285 |
| arCOG00428 |      | S | Protein similar to exonuclease RecJ central domain       | 0 | 4  | NEQ104 |
| arCOG05748 |      | S | Uncharacterized conserved protein                        | 0 | 4  | NEQ298 |
| arCOG02263 | -    | S | Uncharacterized conserved protein                        | 0 | 24 | NEQ277 |
| arCOG02285 | -    | S | Uncharacterized conserved protein                        | 0 | 5  | NEQ310 |
| arCOG03055 | SecD | U | Preprotein translocase subunit SecD                      | 0 | 23 | NEQ436 |
| arCOG03054 | SecF | U | Preprotein translocase subunit SecF                      | 0 | 23 | NEQ437 |
| arCOG03617 | -    | V | CRISPR system related protein                            | 1 | 6  | NEQ019 |
| arCOG04342 | -    | V | CRISPR system related protein, RAMP superfamily          | 0 | 14 | NEQ001 |
| arCOG01445 | -    | V | CRISPR-associated helicase Cas3                          | 0 | 16 | NEQ022 |
| arCOG00794 | -    | V | CRISPR-associated protein Cas4 (RecB family exonuclease) | 0 | 12 | NEQ021 |

**Table S4.** Gene family expansions in the *I. hospitalis* genome

|                                        |                                                                                                                                    |
|----------------------------------------|------------------------------------------------------------------------------------------------------------------------------------|
| WD-40 repeats                          | Igni_0008, Igni_0114, Igni_0419, Igni_0434, Igni_0435, Igni_0477, Igni_0541, Igni_0561, Igni_0808, Igni_1434                       |
| V4R                                    | Igni_0701, Igni_0581, Igni_1239, Igni_1243, Igni_1332, Igni_0267, Igni_0597, Igni_0524, Igni_0644, (and maybe Igni_0643)           |
| CBS domain containing proteins         | Igni_1375, Igni_0444, Igni_0497, Igni_0648, Igni_0831, Igni_1319, Igni_0598, Igni_0655, Igni_1094, Igni_1212, Igni_1414, Igni_1222 |
| Zn-ribbons                             | Igni_1432, Igni_0048, Igni_0593, Igni_0597                                                                                         |
| Cytochrome c                           | Igni_0759, Igni_1052                                                                                                               |
| Uncharacterized                        | Igni_0370, Igni_0806                                                                                                               |
| Thymidylate synthase, flavin-dependent | Igni_0023, Igni_1422                                                                                                               |
| Uncharacterized                        | Igni_0267, Igni_1243                                                                                                               |
| Membrane                               | Igni_0335, Igni_0336                                                                                                               |
| Uncharacterized                        | Igni_0389, Igni_0727                                                                                                               |
| Membrane                               | Igni_0520, Igni_1195                                                                                                               |
| Fe-S?                                  | Igni_0524, Igni_1243, Igni_0267                                                                                                    |
