# Supplementary material for: A genomic analysis of the archaeal system Ignicoccus hospitalis-Nanoarchaeum equitans
Source: PubMed Central journal article supplement (PMC2614490; doi:10.1186/gb-2008-9-11-r158), 2008-11-10
Supplement: gb-2008-9-11-r158-S2.pdf [file gb-2008-9-11-r158-S2.pdf]

Tyr-tRNA synthetase, COG 0162

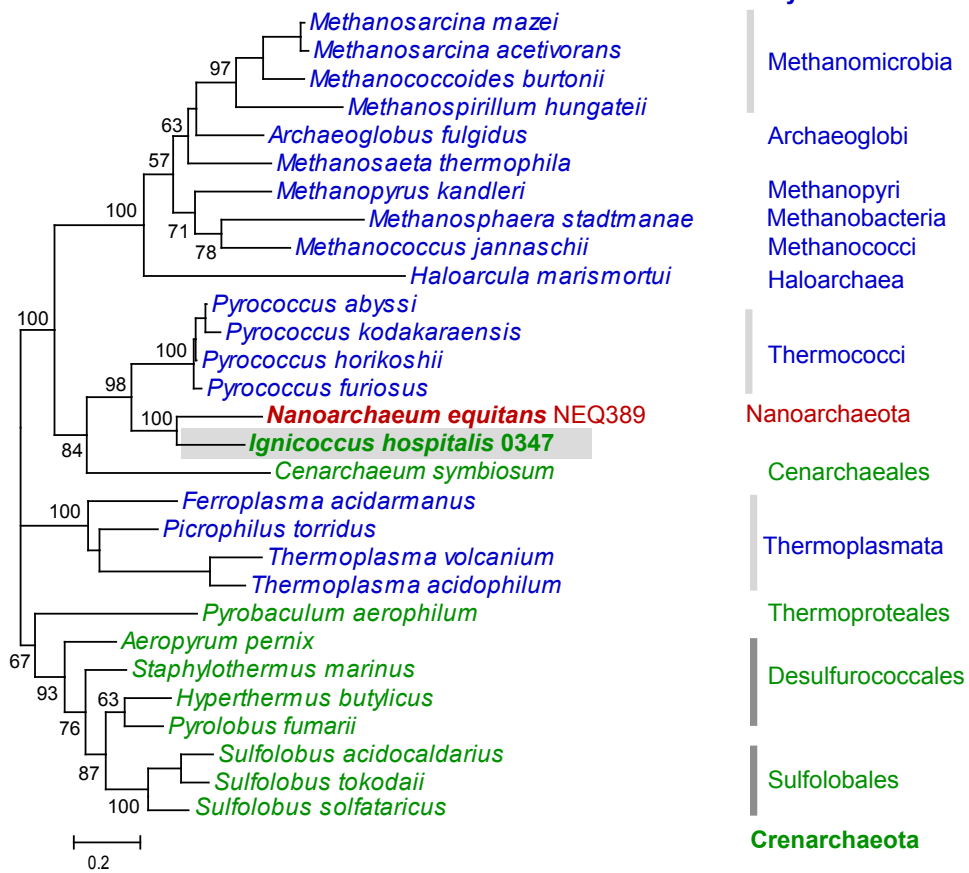

endonuclease IV, COG0648

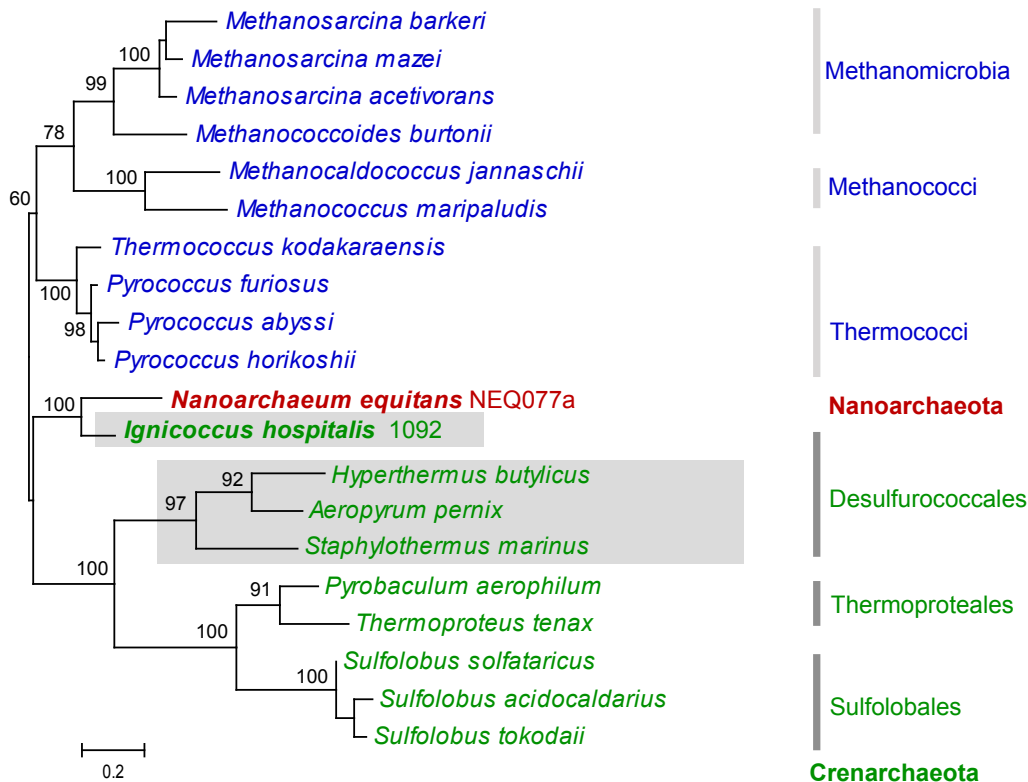

Figure S2. Maximum likelihood phylogenetic trees of archaeal tyrosyl-tRNA synthetases and of family IV endonucleases. Numbers indicate bootstrap support based on 100 replicates. Species that belong to the order Desulfurococcales are shaded. The scale bar indicates the inferred number of substitutions per site.
